# Supplementary material for: Factors Affecting Incurred Pesticide Extraction in Cereals
Source: MDPI journal article supplement (doi:10.3390/molecules28155774), 2023-07-31
Supplement: s1 [file s1]

# Factors Affecting Incurred Pesticide Extraction in Cereals

Xiu Yuan <sup>1</sup>, Chang Jo Kim <sup>1</sup>, Won Tae Jeong <sup>1</sup>, Kee Sung Kyung <sup>2,\*</sup> and Hyun Ho Noh <sup>1,\*</sup>

<sup>1</sup> Residual Agrochemical Assessment Division, Department of Agro-Food Safety and Crop Protection,

National Institute of Agricultural Sciences, Wanju 55365, Republic of Korea;

yx0219@korea.kr (X.Y.);

rlackdwh1@gmail.com (C.J.K.); shewaspretty@korea.kr (W.T.J.)

<sup>2</sup> Department of Environmental and Biological Chemistry, College of Agriculture, Life and Environment Science, Chungbuk National University, Cheongju 28644, Republic of Korea

\* Correspondence: kskyung@cbnu.ac.kr (K.S.K.); noh1983@korea.kr (H.H.N.); Tel.: +82-63-238-3225 (H.H.N.); +82-43-261-2562 (K.S.K.)

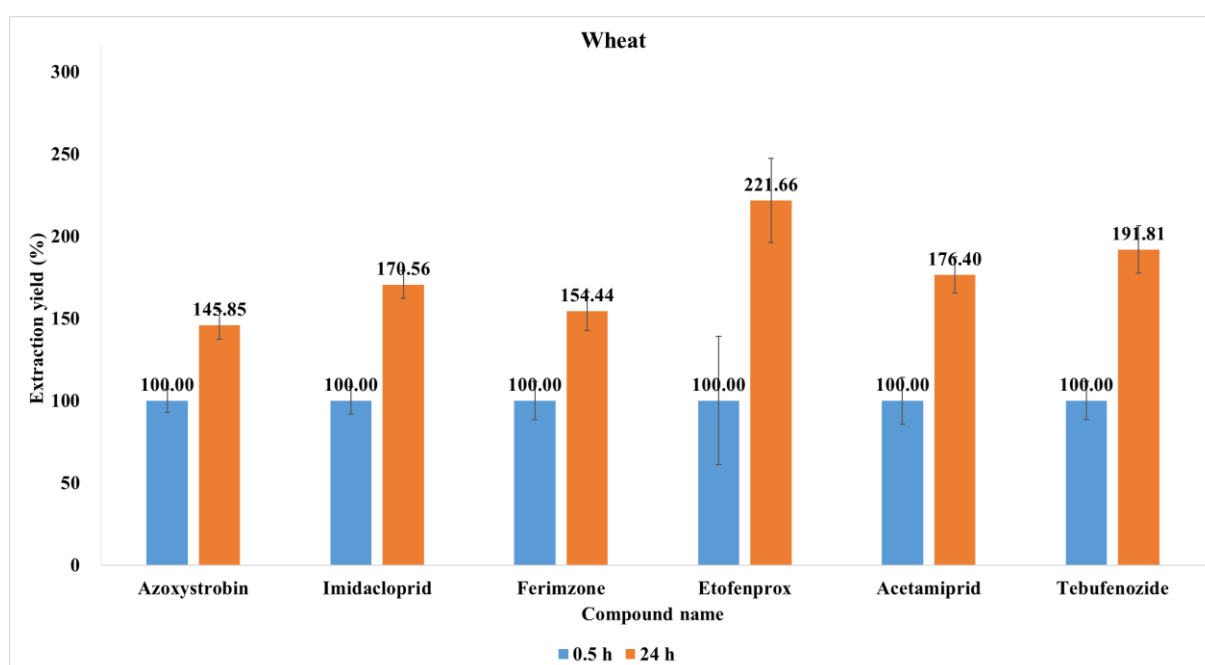

Figure S1. Immersion time optimization. The average extracted pesticide residues concentration at 0.5 h was set as the 100% extraction yield.

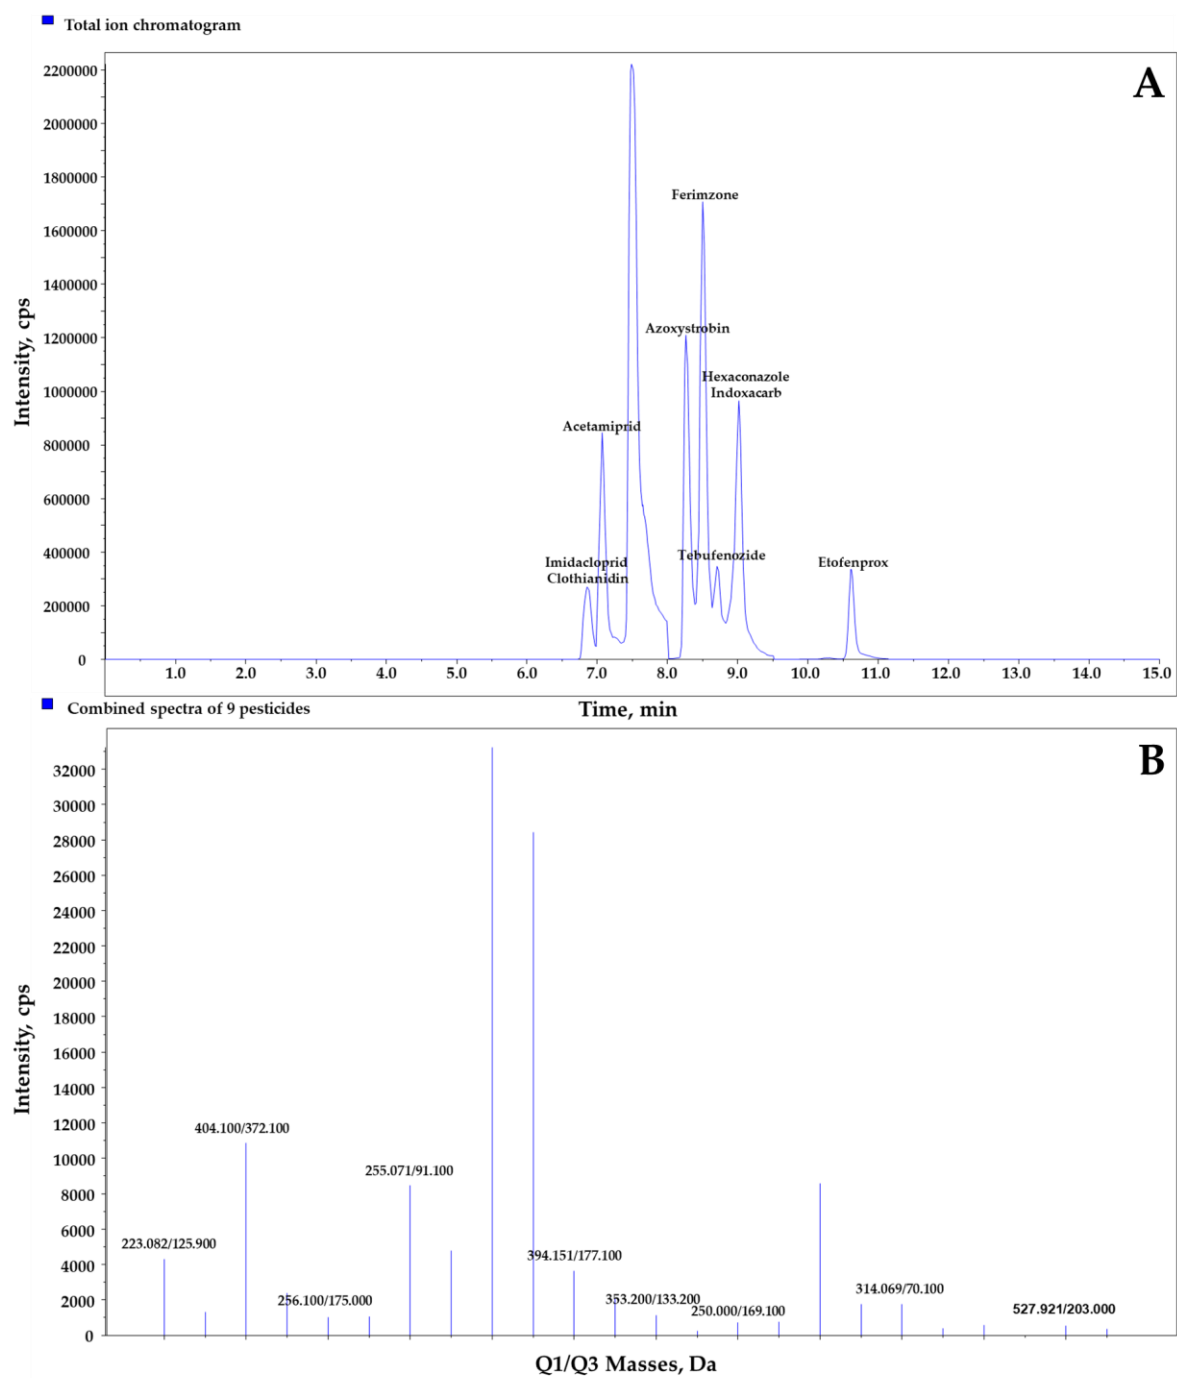

Figure S2. Total ion chromatogram (A) and combined spectra of 9 pesticides (B) at 50 ppb in rice.

**Table S1.** Method validation for rice, wheat, barley, and oat

| Matrix | Compound     | LOQ <sub>method</sub><br>(ng/g) | R <sup>2</sup> | Linear<br>range<br>(µg/kg) | 10 ng/g         |            | 50 ng/g         |            | Matrix<br>effect<br>(%) |
|--------|--------------|---------------------------------|----------------|----------------------------|-----------------|------------|-----------------|------------|-------------------------|
|        |              |                                 |                |                            | Recovery<br>(%) | RSD<br>(%) | Recovery<br>(%) | RSD<br>(%) |                         |
| Rice   | Acetamiprid  | 10                              | 0.997          | 1–50                       | 97.31           | 0.41       | 115.93          | 0.53       | -17.4                   |
|        | Azoxystrobin |                                 | 0.999          |                            | 114.24          | 0.75       | 117.88          | 1.08       | -20.4                   |
|        | Imidacloprid |                                 | 0.998          |                            | 103.17          | 3.75       | 115.79          | 0.53       | -16.6                   |
|        | Ferimzone    |                                 | 0.993          |                            | 88.46           | 3.14       | 117.44          | 2.21       | -38.3                   |
|        | Etofenprox   |                                 | 0.994          |                            | 86.63           | 4.85       | 92.58           | 6.01       | -35.5                   |
|        | Tebufozide   |                                 | 0.999          |                            | 94.86           | 12.87      | 105.31          | 5.22       | -20.5                   |
|        | Clothianidin |                                 | 0.998          |                            | 103.58          | 1.05       | 117.14          | 0.20       | -26.1                   |
|        | Hexaconazole |                                 | 0.998          |                            | 99.55           | 4.53       | 116.98          | 0.29       | -27.1                   |
|        | Indoxacarb   |                                 | 0.992          |                            | 90.33           | 3.01       | 107.96          | 0.81       | -17.4                   |
| Wheat  | Acetamiprid  | 10                              | 0.999          | 1–50                       | 98.63           | 0.87       | 112.59          | 4.68       | -9.8                    |
|        | Azoxystrobin |                                 | 0.998          |                            | 91.27           | 1.78       | 115.35          | 4.12       | -13.6                   |
|        | Imidacloprid |                                 | 0.999          |                            | 111.46          | 1.86       | 111.57          | 4.36       | -8.0                    |
|        | Ferimzone    |                                 | 0.999          |                            | 81.28           | 3.75       | 117.66          | 3.22       | -30.4                   |
|        | Etofenprox   |                                 | 0.999          |                            | 105.86          | 1.81       | 104.50          | 3.91       | -25.2                   |
|        | Tebufozide   |                                 | 0.997          |                            | 103.65          | 9.87       | 114.15          | 6.00       | -12.1                   |
|        | Clothianidin |                                 | 0.999          |                            | 102.77          | 0.44       | 108.60          | 3.04       | -13.7                   |
|        | Hexaconazole |                                 | 0.999          |                            | 95.27           | 11.20      | 106.96          | 5.21       | -10.9                   |
|        | Indoxacarb   |                                 | 0.999          |                            | 102.92          | 1.06       | 115.39          | 3.31       | -9.8                    |
| Barley | Acetamiprid  | 10                              | 0.999          | 1–50                       | 88.30           | 1.37       | 107.65          | 1.54       | -1.1                    |
|        | Azoxystrobin |                                 | 0.997          |                            | 82.10           | 2.18       | 116.18          | 1.77       | -6.6                    |
|        | Imidacloprid |                                 | 0.999          |                            | 92.11           | 4.32       | 105.45          | 3.44       | -1.4                    |
|        | Ferimzone    |                                 | 0.993          |                            | 96.84           | 1.56       | 116.10          | 2.09       | -31.2                   |
|        | Etofenprox   |                                 | 0.999          |                            | 116.82          | 2.12       | 104.54          | 4.61       | -25.0                   |
|        | Tebufozide   |                                 | 0.997          |                            | 84.06           | 0.90       | 117.73          | 4.50       | -5.4                    |
|        | Clothianidin |                                 | 0.999          |                            | 93.55           | 0.75       | 105.95          | 2.63       | -19.7                   |
|        | Hexaconazole |                                 | 0.999          |                            | 96.08           | 2.88       | 101.45          | 1.45       | -7.1                    |
|        | Indoxacarb   |                                 | 0.999          |                            | 94.22           | 1.09       | 101.31          | 2.41       | -1.1                    |
| Oat    | Acetamiprid  | 10                              | 0.999          | 1–50                       | 97.10           | 0.86       | 106.90          | 1.11       | -7.2                    |
|        | Azoxystrobin |                                 | 0.998          |                            | 89.61           | 2.01       | 112.64          | 1.21       | -6.8                    |
|        | Imidacloprid |                                 | 0.999          |                            | 110.34          | 3.54       | 103.37          | 1.69       | -0.8                    |
|        | Ferimzone    |                                 | 0.993          |                            | 101.09          | 0.41       | 114.27          | 1.06       | -51.4                   |
|        | Etofenprox   |                                 | 0.998          |                            | 72.01           | 1.17       | 83.64           | 5.59       | -30.2                   |
|        | Tebufozide   |                                 | 0.999          |                            | 104.02          | 1.67       | 97.63           | 4.49       | -9.6                    |
|        | Clothianidin |                                 | 0.999          |                            | 101.64          | 2.83       | 100.54          | 1.66       | -14.7                   |
|        | Hexaconazole |                                 | 0.999          |                            | 106.53          | 3.52       | 94.27           | 2.39       | -11.0                   |
|        | Indoxacarb   |                                 | 0.999          |                            | 110.39          | 1.29       | 111.82          | 1.00       | -7.2                    |

RSD: Relative Standard Deviation

**Table S2.** MRM conditions

| Compound     | Q1 Mass<br>(Da) | Q3 Mass<br>(Da)    | Time<br>(min) | DP (V)   | EP (V) | CE (V)   | CXP (V)  |
|--------------|-----------------|--------------------|---------------|----------|--------|----------|----------|
| Acetamiprid  | 223.082         | 125.900<br>90.100  | 7.00          | 96       | 10     | 29<br>43 | 10<br>8  |
| Azoxystrobin | 404.100         | 372.100<br>344.100 | 8.25          | 74       | 10     | 19<br>27 | 4<br>4   |
| Imidacloprid | 256.100         | 175.000<br>209.000 | 6.80          | 89       | 10     | 25<br>23 | 4<br>4   |
| Ferimzone    | 255.071         | 91.100<br>65.100   | 8.50          | 121      | 10     | 45<br>73 | 8<br>6   |
| Etofenprox   | 394.151         | 177.100<br>107.000 | 10.64         | 61       | 10     | 21<br>61 | 18<br>12 |
| Tebufozide   | 353.200         | 133.200<br>296.900 | 8.70          | 81       | 10     | 23<br>15 | 4<br>4   |
| Clothianidin | 250.000         | 169.100<br>132.000 | 6.80          | 94<br>71 | 10     | 21<br>35 | 4<br>4   |
| Hexaconazole | 314.069         | 70.100<br>159.000  | 8.90          | 106      | 10     | 25<br>43 | 6<br>12  |
| Indoxacarb   | 527.920         | 203.000<br>149.900 | 8.86          | 166      | 10     | 57<br>33 | 22<br>18 |

DP: Declustering Potential

EP: Entrance Potential

CE: Collision Energy

CXP: Cell Exit Potential

**Table S3.** Average extracted pesticide residue concentrations by particle size

| Crop   | Pesticide    | Extracted pesticide residue by cereal particle size (mg/kg, n = 3) |            |            |            |           |
|--------|--------------|--------------------------------------------------------------------|------------|------------|------------|-----------|
|        |              | <10-mesh                                                           | 10–20-mesh | 20–40-mesh | 40–60-mesh | > 60-mesh |
| Rice   | Acetamiprid  | 14.0 e                                                             | 29.6 d     | 50.6 c     | 89.9 b     | 131.8 a   |
|        | Azoxystrobin | 14.1 d                                                             | 16.6 d     | 45.6 c     | 133.3 b    | 246.9 a   |
|        | Imidacloprid | 21.4 e                                                             | 44.6 d     | 73.4 c     | 125.6 b    | 183.5 a   |
|        | Ferimzone    | 18.3 d                                                             | 28.0 d     | 74.9 c     | 197.2 b    | 326.0 a   |
|        | Etofenprox   | 5.9 c                                                              | 5.2 c      | 8.0 c      | 22.1 b     | 42.8 a    |
|        | Tebufenozide | 5.6 c                                                              | 6.2 c      | 18.6 c     | 61.8 b     | 138.8 a   |
|        | Clothianidin | 1.6 e                                                              | 2.3 d      | 3.6 c      | 5.1 b      | 7.1 a     |
|        | Hexaconazole | 20.1 d                                                             | 29.1 d     | 71.3 c     | 183.9 b    | 328.4 a   |
|        | Indoxacarb   | 10.5 d                                                             | 11.1 d     | 38.7 c     | 153.9 b    | 318.6 a   |
| Wheat  | Acetamiprid  | 38.1 d                                                             | 67.9 c     | 87.8 a     | 86.8 a     | 77.4 b    |
|        | Azoxystrobin | 24.1 d                                                             | 40.3 c     | 70.6 b     | 83.0 a     | 74.5 b    |
|        | Imidacloprid | 44.1 d                                                             | 77.3 c     | 100.6 a    | 99.0 a     | 89.8 b    |
|        | Ferimzone    | 47.2 c                                                             | 88.1 b     | 106.5 a    | 109.8 a    | 86.4 b    |
|        | Etofenprox   | 19.6 d                                                             | 22.3 d     | 42.5.c     | 61.6a      | 56.7 b    |
|        | Tebufenozide | 35.2 e                                                             | 45.8 d     | 69.6 c     | 101.6 a    | 81.3 b    |
|        | Clothianidin | 7.4 c                                                              | 12.9 b     | 14.7 b     | 18.2 a     | 14.2 b    |
|        | Hexaconazole | 31.4 d                                                             | 56.6 c     | 72.8 ab    | 76.3 a     | 61.5 bc   |
|        | Indoxacarb   | 47.8 e                                                             | 60.7 d     | 92.9 c     | 131.4 a    | 117.2 b   |
| Barley | Acetamiprid  | 41.4 e                                                             | 56.6 d     | 99.6 c     | 116.5 b    | 116.5 a   |
|        | Azoxystrobin | 24.6 e                                                             | 32.6 d     | 109.7 c    | 175.3 b    | 192.8 a   |
|        | Imidacloprid | 43.0 e                                                             | 56.0 d     | 101.4 c    | 117.4 b    | 118.7 a   |
|        | Ferimzone    | 29.2 e                                                             | 43.8 d     | 124.1 c    | 162.4 b    | 167.4 a   |
|        | Etofenprox   | 31.0 e                                                             | 34.2 d     | 104.2 c    | 206.1 b    | 232.3 a   |
|        | Tebufenozide | 45.8 e                                                             | 48.8 d     | 154.0 c    | 289.7 b    | 309.2 a   |
|        | Clothianidin | 5.4 e                                                              | 7.4 d      | 13.1 c     | 14.3 b     | 14.4 a    |
|        | Hexaconazole | 20.8 e                                                             | 26.7 d     | 73.9 c     | 97.0 b     | 104.6 a   |
|        | Indoxacarb   | 43.2 e                                                             | 49.9 d     | 181.3 c    | 346.3 b    | 394.1 a   |
| Oat    | Acetamiprid  | 22.9 c                                                             | 59.6 a     | 62.7 a     | 58.3 ab    | 51.4 b    |
|        | Azoxystrobin | 18.4 d                                                             | 39.9 c     | 49.7 b     | 59.6 a     | 57.9 a    |
|        | Imidacloprid | 28.6 c                                                             | 69.5 a     | 73.5 a     | 69.4 a     | 59.6 b    |
|        | Ferimzone    | 19.0 c                                                             | 68.6 ab    | 79.9 a     | 76.1 ab    | 66.5 b    |
|        | Etofenprox   | 16.6 c                                                             | 20.9 bc    | 26.4 b     | 36.9 a     | 37.4 a    |
|        | Tebufenozide | 17.6 d                                                             | 24.3 cd    | 27.6 c     | 44.1 b     | 53.2 a    |
|        | Clothianidin | 3.1 c                                                              | 7.5 a      | 8.1 ab     | 7.4 ab     | 6.5 b     |
|        | Hexaconazole | 12.1 d                                                             | 37.8 c     | 48.2 a     | 46.6 ab    | 41.3 bc   |
|        | Indoxacarb   | 38.3 c                                                             | 46.9 c     | 66.1 b     | 89.7 a     | 93.8 a    |

Notes: Same lowercase letters across a row indicate no significant differences among residue concentrations of same pesticide ( $p < 0.05$ ). Extraction efficiency: a > b > c > d > e
